# Supplementary material
Source: PubMed Central journal article supplement (PMC6201733)
Supplement: supp_6.4.E478_2018-0084-1-at.pdf [file supp_6.4.E478_2018-0084-1-at.pdf]

## Appendix 1 (as supplied by the authors): Supplementary tables

**Supplementary Table A1.** Descriptive characteristics of income quintiles.

| Quintile | Mean after-tax incomes*, \$CDN (sd) | Range of after-tax incomes*, \$CDN | Proportion of low income residents (%) | Mean age*, yr (sd) | Mean percent receiving EI (%) | Dissemination areas, n (%) | Proportion of population (%) |
|----------|-------------------------------------|------------------------------------|----------------------------------------|--------------------|-------------------------------|----------------------------|------------------------------|
| Q1       | 77,379.16<br>(23,207.76)            | 27,550.00 -<br>279,470.00          | 0 – 6.7                                | 40.5 (5.9)         | 8.0 (4.6)                     | 3321 (19.7)                | 18.0                         |
| Q2       | 62,659.18<br>(16,318.30)            | 24,200.00 -<br>223,210.00          | 6.8 – 10.0                             | 40.3 (5.2)         | 9.9 (4.6)                     | 3494 (20.7)                | 22.0                         |
| Q3       | 53,330.04<br>(13,208.75)            | 21,570.00 -<br>147,200.00          | 10.1 - 14.5                            | 39.7 (5.2)         | 10.9 (4.8)                    | 3321 (19.7)                | 20.3                         |
| Q4       | 43,500.37<br>(9,030.02)             | 17,510.00 -<br>132,180.00          | 14.6 - 21.6                            | 38.8 (4.9)         | 11.9 (4.9)                    | 3371 (20.0)                | 19.2                         |
| Q5       | 31,616.71<br>(7,415.12)             | 5,840.00 -<br>73,490.00            | 21.7 - 86.0                            | 36.7 (5.2)         | 13.0 (5.4)                    | 3380 (20.0)                | 20.4                         |

\* Calculated using the median after-tax income and average age for each dissemination area in a given quintile, as provided by Statistics Canada T1FF data.

**Supplementary Table A2.** Rates and 95% CIs of NAS per 1,000 live births, opioid poisonings per 100,000, and non-overdose events per 100,000.

| Year | <b>NAS</b>                          | <b>Opioid Poisonings</b>            |                                 |                                  | <b>Non-poisoning visits</b>         |                                 |
|------|-------------------------------------|-------------------------------------|---------------------------------|----------------------------------|-------------------------------------|---------------------------------|
|      | Rate per 1,000 live births (95% CI) | ED Visits Rate per 100,000 (95% CI) | Hosp. Rate per 100,000 (95% CI) | Deaths Rate per 100,000 (95% CI) | ED Visits Rate per 100,000 (95% CI) | Hosp. Rate per 100,000 (95% CI) |
| 2003 | 1.08 (0.905-1.26)                   | 15.18 (14.49-15.87)                 | 9.70 (9.15-10.25)               | 2.99 (2.68-3.30)                 | 14.06 (13.39-14.72)                 | 12.89 (12.25-13.52)             |
| 2004 | 1.44 (1.42-1.64)                    | 16.49 (15.77-17.20)                 | 10.29 (9.73-10.86)              | 2.74 (2.45-3.04)                 | 19.09 (18.32-19.86)                 | 15.54 (14.85-16.24)             |
| 2005 | 1.57 (1.36-1.78)                    | 16.65 (15.94-17.37)                 | 10.56 (9.99-11.13)              | 3.54 (3.21-3.87)                 | 22.67 (21.84-23.50)                 | 16.84 (16.12-17.56)             |
| 2006 | 1.80 (1.58-2.02)                    | 16.98 (16.26-17.70)                 | 9.73 (9.19-10.27)               | 3.44 (3.12-3.77)                 | 27.00 (26.09-27.90)                 | 14.33 (13.68-14.99)             |
| 2007 | 2.25 (2.00-2.49)                    | 17.47 (16.75-18.20)                 | 9.71 (9.17-10.25)               | 3.67 (3.33-4.00)                 | 29.62 (28.68-30.57)                 | 15.00 (14.32-15.67)             |
| 2008 | 2.52 (2.26-2.78)                    | 18.72 (17.97-19.46)                 | 10.22 (9.66-10.77)              | 3.81 (3.47-4.15)                 | 37.27 (36.21-38.32)                 | 16.60 (15.90-17.31)             |
| 2009 | 3.19 (2.90-3.49)                    | 22.20 (21.39-23.01)                 | 11.16 (10.58-11.73)             | 4.07 (3.72-4.42)                 | 46.72 (45.55-47.90)                 | 18.39 (17.65-19.13)             |
| 2010 | 4.16 (3.82-4.50)                    | 21.63 (20.83-22.42)                 | 10.92 (10.36-11.49)             | 4.35 (3.99-4.70)                 | 51.95 (50.72-53.19)                 | 19.79 (19.03-20.55)             |
| 2011 | 5.31 (4.92-5.69)                    | 22.12 (21.32-22.92)                 | 12.10 (11.51-12.69)             | 4.19 (3.84-4.54)                 | 53.12 (51.88-54.36)                 | 20.92 (20.14-21.70)             |
| 2012 | 5.14 (4.76-5.52)                    | 23.52 (22.70-24.34)                 | 13.24 (12.62-13.85)             | 4.36 (4.01-4.72)                 | 49.26 (48.07-50.44)                 | 23.37 (22.55-24.19)             |
| 2013 | 5.86 (5.45-6.26)                    | 22.51 (17.72-23.31)                 | 12.33 (11.74-12.92)             | 4.72 (4.35-5.08)                 | 43.44 (42.33-44.55)                 | 24.54 (23.71-25.38)             |
| 2014 | 6.54 (6.12-6.97)                    | 24.47 (23.64-25.30)                 | 12.47 (11.88-13.06)             | 4.94 (4.57-5.31)                 | 41.37 (40.30-42.45)                 | 24.28 (23.45-25.11)             |
| 2015 | 6.37 (5.94-6.79)                    | 26.31 (25.45-27.16)                 | 12.65 (12.06-13.25)             | 5.29 (4.91-5.68)                 | 46.61 (45.47-47.75)                 | 25.86 (25.01-26.70)             |
| 2016 | 6.49 (6.06-6.92)                    | 31.66 (30.73-32.60)                 | 13.56 (12.95-14.17)             | N/A                              | 54.26 (53.04-55-48)                 | 27.84 (26.96-28.71)             |

For further information on access to data or programming code, please contact Data and Analytics at Public Health Ontario (analytics@oahpp.ca).
