# Supplementary material
Source: PubMed Central journal article supplement (PMC6201733)
Supplement: supp_6.4.E478_original-submission.pdf [file supp_6.4.E478_original-submission.pdf]

1  
2  
3 1 **Opioid-related harms and socioeconomic inequalities in Ontario: A population health**  
4  
5  
6 2 **assessment**  
7  
8 3

9  
10 4 Zoe F. Cairncross BScH<sup>1,2</sup>, Jeremy Herring MSc<sup>2</sup>, Trevor van Ingen MPH<sup>2</sup>,

11  
12 5 Brendan T. Smith MSc PhD<sup>1,2</sup>, Pamela Leece MD MSc<sup>1,2</sup>,

13  
14 6 Brian Schwartz MD MScCH<sup>1,2</sup>, Karin Hohenadel MSc<sup>2</sup>  
15  
16  
17  
18 7

19  
20 8 <sup>1</sup>Dalla Lana School of Public Health, University of Toronto, Toronto, Canada,  
21

22 9 <sup>2</sup>Public Health Ontario, Toronto, Canada  
23  
24  
25 10  
26  
27  
28 11  
29  
30 12  
31  
32 13  
33  
34  
35 14  
36  
37 15  
38  
39  
40 16 **Corresponding Author:**  
41

42 17 Zoe Cairncross  
43

44 18 zoe.cairncross@mail.utoronto.ca  
45  
46  
47 19

48  
49 20 **Funding Statement:** No external funding was received.  
50  
51  
52 21

53  
54 22 **Conflict of Interest Statement:** The authors declare that no conflict of interest exists.  
55  
56  
57  
58  
59  
60

1  
2  
3 **23** **ABSTRACT**  
4

5 **24** **BACKGROUND:** Negative health outcomes associated with the use of both prescribed and non-  
6  
7  
8  
9  
10  
11  
12  
13  
14  
15  
16  
17  
18  
19  
20  
21  
22  
23  
24  
25  
26  
27  
28  
29  
30  
31  
32  
33  
34  
35  
36  
37  
38  
39  
40  
41  
42  
43  
44  
45  
46  
47  
48  
49  
50  
51  
52  
53  
54  
55  
56  
57  
58  
59  
60  
**24** prescribed opioids are increasingly prevalent. This study examines long-term trends in opioid-  
**25** prescribed opioids are increasingly prevalent. This study examines long-term trends in opioid-  
**26** related harms in Ontario and the relationship between harms and neighbourhood income.

**27** **METHODS:** We examined rates of neonatal abstinence syndrome (NAS), opioid poisonings (fatal  
**28** and non-fatal), and non-poisoning opioid-related harms from 2003 to 2016 in Ontario using  
**29** population-based health administrative databases. Rates were calculated for harm indicators  
**30** across neighbourhood income quintiles. Social inequalities in opioid-related harms were  
**31** examined on both relative (prevalence ratios) and absolute (potential rate reductions) scales.

**32** **RESULTS:** Rates of opioid related harms increased dramatically between 2003 and 2016. After  
**33** stratifying by income, NAS, opioid poisoning, and non-poisoning events demonstrated a strong  
**34** social gradient with harm rates being lowest in high-income neighbourhoods and highest in  
**35** low-income neighbourhoods. Prevalence ratios for low-income neighbourhoods compared to  
**36** high-income neighbourhoods ranged from 2.36 (95% CI: 2.15-2.58) for opioid poisoning  
**37** emergency department visits to 3.70 (95% CI: 2.62-5.23) for NAS. Potential rate reductions for  
**38** these harms ranged from 34.8% to 49.9%, suggesting that at least one third of all harmful  
**39** events could be prevented if all neighbourhoods had the same socio-economic profile as the  
**40** highest quintile.

**41** **INTERPRETATION:** Rates of opioid-related harms are increasing in Ontario. Neighbourhoods  
**42** with a high proportion of low-income residents are experiencing substantially higher rates of  
**43** opioid-related harms. This finding can inform planning for opioid-related public health  
**44** interventions.

## 45 INTRODUCTION

46 In the past 25 years, opioid-related mortality in Ontario has increased by 285 percent, with over  
47 730 deaths in 2015 alone.<sup>1,2</sup> Contributing to the high mortality rates from opioids is the  
48 widespread dispensing of prescription opioids, which have also been shown to be a major  
49 cause of mortality across Canada and internationally.<sup>3-6</sup> Globally, Canada is the second largest  
50 consumer of prescription opioids, with the province of Ontario having the highest dispensing  
51 rates of strong opioids in the country.<sup>7,8</sup> Adding to the challenge that ensues from high rates of  
52 opioid prescription is the availability of fentanyl in the illicit drug supply, which is leading to a  
53 rapidly growing number of opioid-related deaths in both the United States and Canada.<sup>1,2,9,10</sup>

54 Opioid morbidity and mortality have been found to be positively associated with social  
55 marginalization: harms from opioids are especially common among the unemployed and those  
56 living in poverty<sup>11-15</sup>. However, the increasingly widespread prescription of opioid medications  
57 for non-cancer pain and other conditions has led to speculation that the socioeconomic profiles  
58 of those dying or suffering significant other harms related to opioids might be shifting from  
59 marginalized populations to the middle-class.<sup>16</sup> Supporting this viewpoint are the results of a  
60 recent Ontario-based analysis of the dispensing patterns of prescription opioids. In 2016, the  
61 1.7 million Ontarians who were prescribed an opioid medication for the treatment of pain were  
62 evenly distributed across income quintiles.<sup>17</sup> Furthermore, well-publicized opioid-related deaths  
63 of individuals from more affluent backgrounds would seem to support this theory of  
64 demographic shift. To test the hypothesis that harm rates from opioids are shifting in Canada,  
65 we analyzed population-based trends in opioid-related morbidity and mortality in Ontario,

66 Canada from 2003 to 2016, and estimated the extent to which socioeconomic inequalities in  
67 opioid related morbidity and mortality exist in Ontario.

68 Six indicators of opioid-related harms were evaluated in this study: neonatal abstinence  
69 syndrome (NAS); opioid poisonings (emergency room (ED) visits, hospitalizations, and deaths);  
70 and non-poisoning opioid-related events (ED visits and hospitalizations). Previous analyses have  
71 focused solely on the burden of accidental and intentional opioid poisonings in Ontario, but we  
72 chose to assess a broad range of events to include non-poisoning opioid-related harms such as  
73 opioid withdrawal and opioid use disorder.<sup>1,2,18</sup> Likewise, although maternal opioid use is not  
74 the only cause of NAS, previous studies have found that at least 60% of infants born to opioid-  
75 dependent women show associated symptoms of NAS.<sup>19-23</sup>

76

## 77 **METHODS**

### 78 **Data Sources and Case Identification**

79 We conducted a population-based assessment including all cases of opioid morbidity (NAS,  
80 non-fatal opioid poisonings, and non-poisoning events) and mortality identified in population-  
81 based health administrative datasets in the province of Ontario, Canada from 2003 to 2016.

82 Cases of NAS were identified using the Discharge Abstract Database (DAD). NAS is  
83 defined by withdrawal symptoms an infant may experience after birth if the mother used  
84 certain medications or other substance during pregnancy.

85 Opioid poisonings resulting in emergency department visits, hospitalizations, and death  
86 were identified from three sources, respectively: the National Ambulatory Care Reporting  
87 System (NACRS), DAD, and the Ontario Opioid-Related Death Database (OORDD). Opioid

1  
2  
3 88 poisoning includes any therapeutic, intentional, accidental, or unknown use of opioids resulting  
4  
5  
6 89 in poisoning.  
7

8 90 Non-poisoning opioid-related events include any harmful effect of opioid use that does  
9  
10 91 not result in poisoning, such as opioid use disorder or opioid withdrawal. Non-poisoning ED  
11  
12 92 visits were identified from NACRS. Non-poisoning hospitalizations were identified from DAD  
13  
14 93 and the Ontario Mental Health Reporting System (OMHRS). Unique cases of non-poisoning  
15  
16 94 opioid-related events resulting in ED visits or hospitalization were identified by ICD-10-CA codes  
17  
18 95 for mental and behavioural disorders due to use of opioids.  
19  
20  
21

22 96 Full details of the case definitions and ICD codes used for the analysis can be found in  
23  
24 97 Appendix 1. This project was approved by the Public Health Ontario Ethics Review Board.  
25  
26  
27 98 Age, sex, date of admission, postal code of residence, and all diagnosis codes were extracted for  
28  
29 99 all cases.  
30  
31

### 32 100 **Quantifying Neighbourhood Income**

33  
34  
35 101 Neighbourhood income was determined using 2011 Statistics Canada Annual Estimates for  
36  
37 102 Census Families and Individuals (T1 Family File) after-tax low income measures (LIMs). LIMs are  
38  
39 103 a relative measure of low income, defined as 50% of the median census family income for a  
40  
41 104 given family type and size. Tax filer data from 2011 was used on the basis of availability, and  
42  
43 105 due to Statistics Canada data showing that proportions of low-income residents in Ontario have  
44  
45 106 not changed significantly from 2011 to 2015.<sup>24</sup>  
46  
47  
48

49 107 For the purposes of this investigation, Ontario dissemination areas (DAs) were ranked by  
50  
51 108 the percent of census families in the area earning less than the after-tax LIM, and divided into  
52  
53 109 fifths, where the first quintile represented an area with high income, and the fifth quintile  
54  
55  
56  
57  
58  
59  
60

1  
2  
3 110 represented an area of low income. There were 327 DAs not included in the quintile calculation  
4  
5  
6 111 as they either had a population of zero, or tax information was suppressed in the data due to  
7  
8 112 having fewer than 100 individuals in the area that filed taxes. Descriptive characteristics of each  
9  
10  
11 113 income quintile are included in Appendix 2 (Table 1).

### 12 13 114 **Geocoding of Cases to Income Quintiles**

14  
15 115 Postal code boundaries in Canada do not directly align with DA boundaries. To mitigate this,  
16  
17  
18 116 cases of NAS, opioid poisoning, or non-poisoning events were geocoded to their corresponding  
19  
20  
21 117 census dissemination areas by joining their postal code of residence with the Statistics Canada  
22  
23 118 Postal Code Conversion File (PCCF).<sup>25</sup> The single-link indicator (SLI) was used if the postal code  
24  
25 119 of a case corresponded to more than one DA. The SLI determines the postal code to which a DA  
26  
27  
28 120 corresponds by determining where the majority of dwellings in a given postal code reside.  
29  
30  
31 121 Hence some cases may not have been assigned to their correct DA, and could therefore  
32  
33 122 potentially be assigned to the incorrect income quintile. However, as it is unlikely that  
34  
35 123 neighbouring DAs have drastically different socioeconomic profiles, this should not have a large  
36  
37  
38 124 impact on the results of our study.

### 39 40 125 **Rate Calculations**

41  
42 126 Annual counts of live births in Ontario hospitals from 2003 to 2016 were obtained from DAD  
43  
44  
45 127 and used as the denominator to calculate yearly rates of NAS. Ontario population estimates for  
46  
47  
48 128 2003 to 2015, and projections for 2016, were obtained from IntelliHealth Ontario and used as  
49  
50  
51 129 the denominator to calculate yearly rates of opioid-related poisoning and non-poisoning  
52  
53  
54  
55  
56  
57  
58  
59 130 events.<sup>26,27</sup>  
60

1  
2  
3 131 To calculate quintile-specific rates for NAS, opioid poisonings and non-poisoning events,  
4  
5  
6 132 we first created our quintiles as determined by the 2011 Statistics Canada T1 Family File.  
7  
8 133 However, because the Ontario population has grown by approximately 700,000 people  
9  
10 134 between 2011 and 2016, the total population estimated by the T1 Family File is markedly  
11  
12  
13 135 smaller than the current Ontario population. Therefore if we were to create quintile-specific  
14  
15 136 rates of NAS, opioid poisonings, or non-poisoning events using this measure of population, they  
16  
17  
18 137 would be overestimates of the true incidence. To account for this, we calculated the percent of  
19  
20 138 the population in each income quintile as estimated by the T1 Family File, and applied it to the  
21  
22  
23 139 total Ontario 2016 population used in our yearly rates to create a more accurate denominator.  
24  
25 140 We were then able to compare our annual rates for NAS, opioid poisonings, and non-poisoning  
26  
27  
28 141 events, to our quintile-specific rates. Due to a lack of data on opioid-related deaths for 2016,  
29  
30 142 quintile-specific rates for deaths were calculated for 2015.

### 32 143 **Statistical Analyses**

34  
35 144 We calculated crude rates and 95% confidence intervals of NAS, opioid poisonings and non-  
36  
37 145 poisoning events in the population and across income quintiles. Age-standardized rates were  
38  
39  
40 146 not calculated because age-specific rates of opioid morbidity and mortality over time have  
41  
42 147 neither been constant over time, nor have they held a consistent relationship between age-  
43  
44 148 groups.<sup>1,2,28,29</sup>

46  
47 149 Prevalence ratios and corresponding 95% confidence intervals were calculated by  
48  
49 150 comparing NAS, opioid poisonings and non-poisoning rates in the least advantaged quintile to  
50  
51  
52 151 those in the most advantaged quintile. Potential rate reductions (PRR) and corresponding 95%  
53  
54 152 confidence intervals were calculated for each opioid indicator.<sup>30</sup> The PRR represents the  
55  
56  
57  
58  
59  
60

1  
2  
3 153 potential reduction in rates of a health outcome if all groups had the same income profile as  
4  
5  
6 154 the highest income quintile. A higher PRR represents greater inequality in the population.  
7  
8 155 Attributable cases and corresponding 95% confidence intervals were calculated by multiplying  
9  
10 156 each PRR by the total number of cases in the population for a given indicator. The attributable  
11  
12  
13 157 cases represent the absolute number of cases in a population that could be prevented if all  
14  
15  
16 158 groups experienced the same rate as the highest income quintile.

17  
18 159 All statistical analyses were completed using SAS version 9.3 statistical software.  
19  
20  
21 160

## 22 161 **RESULTS**

### 23 24 25 162 **Descriptive Statistics**

26  
27 163 Our analysis included trends for NAS, opioid poisonings, and non-poisoning events occurring in  
28  
29  
30 164 Ontario between 2003 and 2016. Table 1 presents the distribution of NAS, ED visits and  
31  
32 165 hospitalizations for opioid poisonings and non-poisoning events (2016) and opioid-related  
33  
34  
35 166 deaths (2015) by age, sex, and income quintile related to the most recent available data.  
36

37 167 Opioid poisonings and non-poisonings events occurred primarily in individuals aged 25  
38  
39  
40 168 to 64. Hospitalizations for both opioid poisonings and non-poisonings had a relatively even  
41  
42 169 distribution of events across sex, while deaths, poisoning, and non-poisoning ED visits had  
43  
44  
45 170 higher distributions of events for males as compared to females. Low-income quintiles were  
46  
47 171 more likely to experience opioid events across all indicators compared to high-income quintiles.  
48  
49  
50 172

51  
52 173

53  
54 174  
55  
56  
57  
58  
59  
60



**Table 1.** Descriptive characteristics of NAS, opioid poisonings, and non-poisoning events in 2016, and opioid-related deaths in 2015.

| Variable                  | NAS, n (%) | Opioid Poisonings, n (%) |            |            | Non-Poisoning Events, n (%) |             |
|---------------------------|------------|--------------------------|------------|------------|-----------------------------|-------------|
|                           |            | ED Visits                | Hosp.      | Deaths     | ED Visits                   | Hosp.       |
| Total                     | 882        | 4420                     | 1893       | 730        | 7575                        | 3886        |
| Age                       | N/A        |                          |            |            |                             |             |
| < 14                      |            | 89 (2.0)                 | 42 (2.2)   | 1 (0.1)    | 11 (0.1)                    | 33 (0.8)    |
| 15-24                     |            | 701 (15.9)               | 164 (8.7)  | 71 (9.7)   | 1226 (16.2)                 | 445 (11.5)  |
| 25-44                     |            | 1898 (42.9)              | 533 (28.2) | 303 (41.5) | 4307 (56.9)                 | 1804 (46.4) |
| 45-64                     |            | 1257 (28.4)              | 721 (38.1) | 318 (43.6) | 1701 (22.5)                 | 1140 (29.3) |
| 65+                       |            | 475 (10.8)               | 432 (22.8) | 34 (4.7)   | 325 (4.3)                   | 464 (11.9)  |
| Sex                       | N/A        |                          |            |            |                             |             |
| Male                      |            | 2461 (55.7)              | 910 (48.1) | 474 (64.9) | 4610 (60.9)                 | 1881 (48.4) |
| Female                    |            | 1958 (44.3)              | 982 (51.9) | 256 (35.1) | 2965 (39.1)                 | 2005 (51.6) |
| Not identified            |            | 1 (0.0)                  | 1 (0.1)    | 0 (0.0)    | 0 (0.0)                     | 0 (0.0)     |
| Income Quintile           |            |                          |            |            |                             |             |
| Q1                        | 64 (7.3)   | 480 (10.9)               | 208 (11.0) | 74 (10.1)  | 638 (8.4)                   | 384 (9.9)   |
| Q2                        | 103 (11.7) | 728 (16.5)               | 335 (17.7) | 102 (14.0) | 1021 (13.5)                 | 572 (14.7)  |
| Q3                        | 135 (15.3) | 790 (17.9)               | 350 (18.5) | 109 (14.9) | 1653 (21.8)                 | 634 (16.3)  |
| Q4                        | 176 (20.0) | 806 (18.2)               | 364 (19.2) | 148 (20.3) | 1381 (18.2)                 | 692 (17.8)  |
| Q5                        | 384 (43.5) | 1283 (29.0)              | 562 (29.7) | 251 (34.4) | 2214 (29.2)                 | 1456 (37.5) |
| Undetermined <sup>†</sup> | 20 (2.3)   | 333 (7.5)                | 74 (3.9)   | 46 (6.3)   | 668 (8.8)                   | 148 (3.8)   |

<sup>†</sup>Due to missing postal code, invalid postal code, or suppressed DA information.

175

176

### 177 Long-Term Rates of Opioid Use Indicators

178 Figure 1 presents crude rates of NAS, opioid poisonings, and non-poisoning events in Ontario  
179 from 2003 to 2016. Annual rates and corresponding 95% confidence intervals for NAS, opioid  
180 poisonings, and non-poisoning events can be found in Appendix 2 (Table 2).

181 Over the study period, the percent change in indicator rates ranged from a 39.8%  
182 increase in opioid poisoning hospitalizations, to a 499.9% increase in NAS. From 2014 to 2016,  
183 however, rates of NAS in Ontario have held relatively constant around 6.5 cases per 1,000 live  
184 births. Rates of ED visits for non-poisoning events increased by 286.0%, from 14.06 in 2003  
185 (n=1721) to 54.26 in 2016 (n=7575). Despite a large absolute decrease in ED visits between  
186 2011 (n=7046) and 2014 (n=5659), rates returned to their previous levels in 2016.

187

Rates of NAS from 2003 to 2016

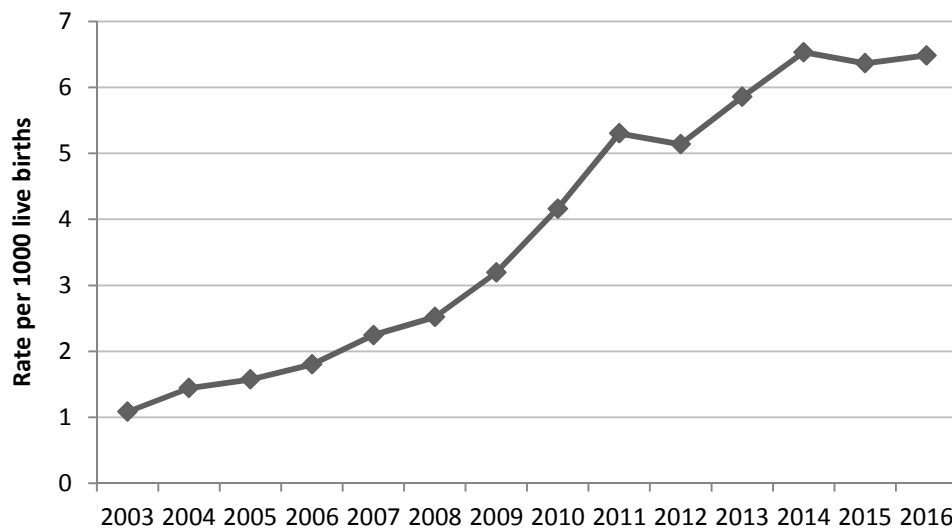

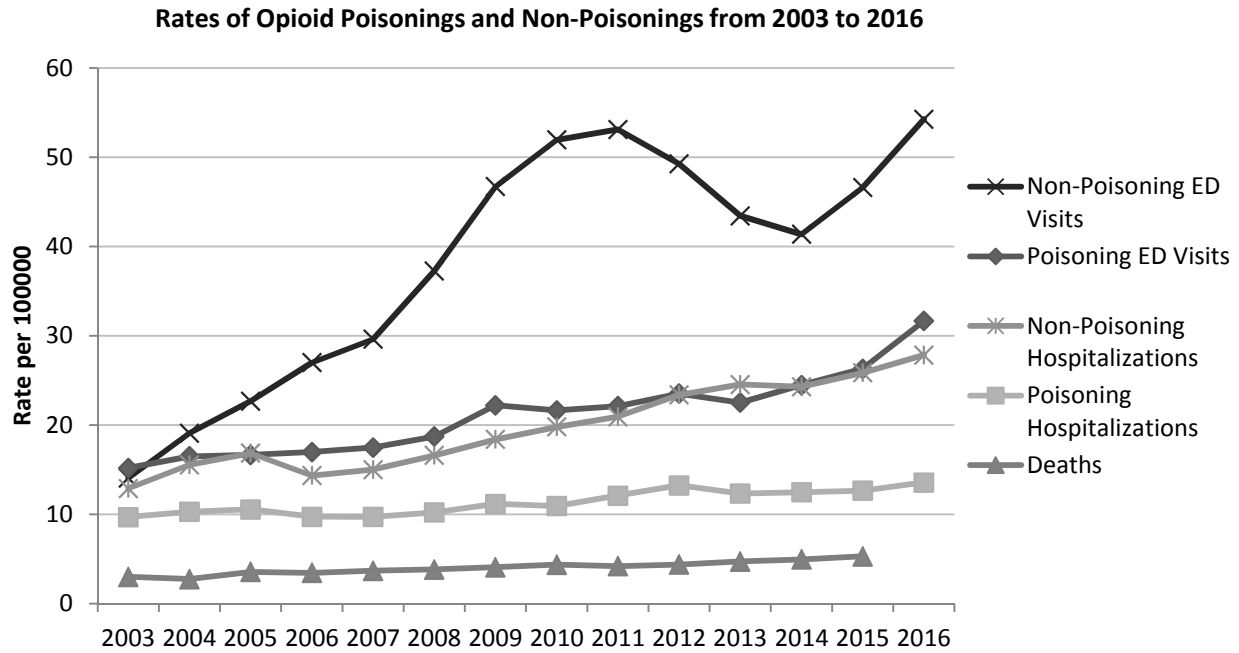

**Figure 1.** Crude rates of NAS, opioid poisonings, and non-poisoning events in Ontario, 2003-2016.

188

### 189 Rates by Income Quintile

190 Figure 2 presents crude rates of NAS, opioid poisoning and non-poisoning ED visits and  
 191 hospitalizations and opioid-related deaths by income quintile, where Q1 represents the highest  
 192 income neighbourhoods and Q5 represents the lowest income neighbourhoods. Results show  
 193 that NAS, opioid poisoning, and non-poisoning events all demonstrated the social gradient, with  
 194 rates of opioid-related harms increasing from highest to lowest income quintiles.

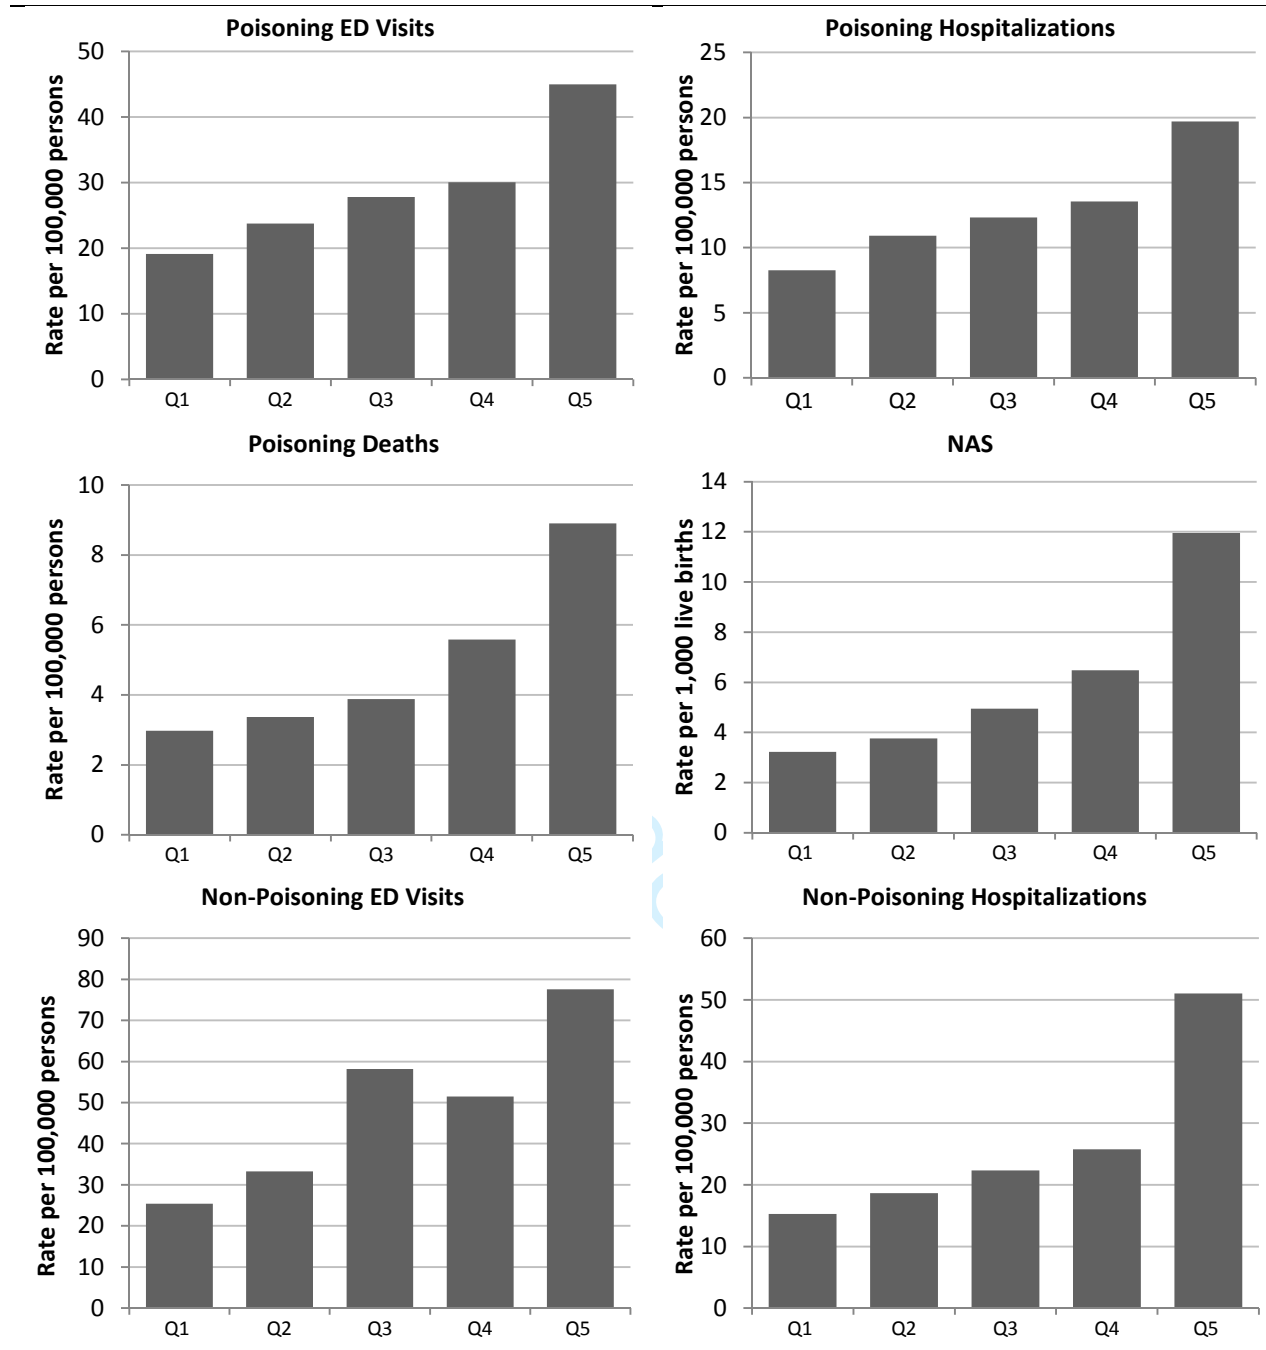

**Figure 2.** Crude rates of opioid poisoning ED visits and hospitalizations, non-poisoning ED visits and hospitalizations by neighbourhood income quintile in Ontario in 2016, and crude rates of opioid-related deaths by neighbourhood income quintile in Ontario in 2015, where Q1 represents high-income neighbourhoods and Q5 represents low-income neighbourhoods.

## 196 **Absolute and Relative Calculations**

197 Table 2 presents the prevalence ratio, PRR, and the absolute number of cases attributable to  
 198 socioeconomic inequalities in the population for NAS, opioid poisonings, and non-poisoning  
 199 events. Significant social inequalities were observed on both absolute and relative scales. Living  
 200 in the lowest income neighbourhoods was associated with at least double the prevalence of  
 201 opioid-related harms for NAS, opioid poisonings, and non-poisoning events, compared to those  
 202 living in the highest income neighbourhoods.

203 PRRs in opioid-related harms were demonstrated for all cases of NAS, opioid poisonings,  
 204 and non-poisoning events, if all groups were to experience the same rates as the highest  
 205 income neighbourhoods. In absolute terms, this would mean a significant annual reduction in  
 206 the number of ED visits, hospitalizations, and deaths due to NAS, opioid poisonings, and non-  
 207 poisoning events.

**Table 2.** Prevalence ratios, PRRs, and cases attributable to socioeconomic inequality of NAS, opioid poisoning and non-poisoning ED visits and hospitalizations in 2016, and opioid-related deaths in 2015.

| Indicator            | Prevalence Ratio (95% CI) | PRR% (95% CI)    | Attributable Cases (95% CI) |
|----------------------|---------------------------|------------------|-----------------------------|
| NAS                  | 3.70 (2.62-5.23)          | 49.9 (36.7-60.5) | 440.1 (324.0-533.7)         |
| Opioid Poisonings    |                           |                  |                             |
| ED Visits            | 2.36 (2.15-2.58)          | 34.8 (29.1-40.1) | 1538.9 (1287.8-1772.4)      |
| Hospitalizations     | 2.38 (2.07-2.73)          | 36.5 (28.0-44.2) | 691.6 (529.2-836.9)         |
| Deaths               | 2.99 (2.25-3.97)          | 40.0 (25.8-51.7) | 291.7 (188.1-377.5)         |
| Non-Poisoning Events |                           |                  |                             |
| ED Visits            | 3.06 (2.77-3.38)          | 48.7 (44.8-52.4) | 3691.6 (3394.9-3969.3)      |
| Hospitalizations     | 3.34 (2.92-3.83)          | 43.0 (37.4-48.2) | 1670.4 (1451.5-1871.7)      |

1  
2  
3 208 **INTERPRETATION**  
4

5  
6 209 Rates of opioid-related harms have markedly increased from 2003 to 2016. After stratifying by  
7  
8 210 neighbourhood income quintile, rates of NAS, opioid poisonings, and non-poisoning events all  
9  
10 211 demonstrate increasing rates with decreasing neighbourhood income. Furthermore, the lowest  
11  
12 212 neighbourhood income quintile is particularly at risk of opioid-related harms, with rates of NAS,  
13  
14 213 opioid poisonings, and non-poisoning events at least double that of the highest income group.  
15  
16 214 PRR calculations indicated that at least 30% of the cases of opioid poisoning, non-poisoning  
17  
18 215 events, and NAS could be prevented if all groups experienced the same rates as those in the  
19  
20 216 highest income group. Together, these results suggest there may be significant health  
21  
22 217 disparities between low and high-income areas in Ontario with respect to opioid-related  
23  
24 218 morbidity and mortality.  
25  
26  
27  
28  
29

30 219 Our study was successful in replicating a well-established pattern in the literature  
31  
32 220 showing relatively constant increases in rates of NAS, as demonstrated in Ontario and the  
33  
34 221 United States.<sup>31-34</sup> For example, Brogly et al. (2017) found a 16-fold increase in infants born to  
35  
36 222 opioid-dependent mothers from 2002 to 2014 in Ontario, while in the United States, Tolia et al.  
37  
38 223 (2015) found a 286% increase from 2004 to 2013 in neonatal ICU admissions due to NAS.<sup>31,32</sup>  
39  
40 224 Results from our study further examine this trend, demonstrating that NAS is  
41  
42 225 disproportionately experienced by women from low-income neighbourhoods. These findings  
43  
44 226 from Ontario are consistent with other jurisdictions.<sup>34-35</sup> A study by Patrick et al. (2012) found  
45  
46 227 that state Medicaid programs (social health care programs for low income and disabled  
47  
48 228 individuals who cannot afford health care) were the predominant payer for 60% of mothers  
49  
50 229 using opiates, and 78% of newborns diagnosed with NAS in the United States in 2009.<sup>34</sup>  
51  
52  
53  
54  
55  
56  
57  
58  
59  
60

1  
2  
3 230 Rates of other opioid poisonings and non-poisoning events also fit with what is known  
4  
5 231 on opioid-related harms in Ontario.<sup>1,2,18</sup> One particular trend of interest is that of the non-  
6  
7  
8 232 poisoning opioid-related ED visits, which show a large decrease around 2011, and a subsequent  
9  
10 233 rise in 2014. Though it could not be causally connected, we speculate that this could be related  
11  
12  
13 234 to the February 2012 introduction of tamper-resistant oxycodone in Ontario, as this trend maps  
14  
15 235 with the decrease in oxycodone-related deaths in Ontario, and the rise in fentanyl and  
16  
17 236 hydromorphone related deaths soon after.<sup>2</sup> It could also be related to changed opioid  
18  
19  
20 237 prescribing guidelines in 2010, and the expansion of methadone and buprenorphine  
21  
22  
23 238 programs.<sup>36,37</sup>

24  
25 239 Results for opioid-related harms by neighbourhood income also fit with findings from  
26  
27 240 the United States, in which oxycodone poisoning deaths and ED visits for drug-related  
28  
29  
30 241 poisonings have been found to increase with decreasing neighbourhood income.<sup>38-41</sup>

31  
32 242 There are several limitations to our study. The use of administrative databases means  
33  
34  
35 243 we have only captured Ontario residents who visited an ED, were admitted to a hospital, or  
36  
37 244 died in the province over our study period. Individuals could not be included if a postal code of  
38  
39  
40 245 residence was not recorded, had an invalid postal code recorded, or were geocoded to a  
41  
42 246 suppressed DA. By excluding these cases from our analysis, 6.6% (n=1289) of all cases were not  
43  
44  
45 247 included. Given that people who use opioids may not pursue medical help at a hospital for a  
46  
47 248 variety of reasons, reported values are likely to be an underestimate of the true rates and  
48  
49  
50 249 income inequalities in opioid-related harms in Ontario. We are also not able to determine  
51  
52 250 whether individuals identified in the database used opioids acquired by prescription, obtained  
53  
54  
55 251 them through diversion of prescription medication, or used an illicit opioid. While this limits the

1  
2  
3 252 specificity of our analysis, it at the same time captures the overall burden in the entire  
4  
5  
6 253 population, rather than only those who were prescribed opioids. Finally, our analysis assumes  
7  
8 254 that the socioeconomic structuring of Ontario neighbourhoods has remained stable from 2011  
9  
10  
11 255 to 2016.

12  
13 256 In summary, the present study found that all opioid use indicators studied have  
14  
15 257 demonstrated steady increases from 2003 to 2016 in Ontario. Our results suggest low-income  
16  
17  
18 258 neighbourhoods experience higher rates of opioid-related harms in Ontario.  
19  
20  
21  
22  
23  
24  
25  
26  
27  
28  
29  
30  
31  
32  
33  
34  
35  
36  
37  
38  
39  
40  
41  
42  
43  
44  
45  
46  
47  
48  
49  
50  
51  
52  
53  
54  
55  
56  
57  
58  
59  
60

Confidential



1  
2  
3 259 **References:**  
4

- 5  
6 260 1. Gomes T, Greaves S, Martins D, Bandola D, Tadrous M, Singh S, et al. Latest trends in opioid-  
7  
8 261 related deaths in Ontario: 1991 to 2015. Toronto, ON: Ontario Drug Policy Research  
9  
10 262 Network; 2017. Available: <http://odprn.ca/research/publications/latest-trends-in-opioid->  
11  
12 263 [related-deaths-in-ontario-1991-to-2015/](http://odprn.ca/research/publications/latest-trends-in-opioid-related-deaths-in-ontario-1991-to-2015/) (accessed 2017 Aug 8).  
13  
14  
15 264 2. Ontario Agency for Health Protection and Promotion (Public Health Ontario). Opioid-related  
16  
17 265 morbidity and mortality in Ontario. Toronto, ON: Queen's Printer for Ontario; 2017.  
18  
19 266 Available: <http://www.publichealthontario.ca/en/dataandanalytics/pages/opioid.aspx>  
20  
21 267 (accessed 2017 Aug 8).  
22  
23  
24  
25 268 3. Bohnert AS, Valenstein M, Bair MJ, Ganoczy D, McCarthy JF, Ilgen MA, et al. Association  
26  
27 269 between opioid prescribing patterns and opioid overdose-related deaths. *JAMA*.  
28  
29 270 2011;305(13):1315-21.  
30  
31  
32 271 4. Dhalla IA, Mamdani MM, Sivilotti ML, Kopp A, Qureshi O, Juurlink DN. Prescribing of opioid  
33  
34 272 analgesics and related mortality before and after the introduction of long-acting oxycodone.  
35  
36 273 *CMAJ*. 2009;181(12):891-6.  
37  
38  
39  
40 274 5. Ray WA, Chung CP, Murray KT, Hall K, Stein CM. Prescription of long-acting opioids and  
41  
42 275 mortality in patients with chronic noncancer pain. *JAMA*. 2016;315(22):2415-23.  
43  
44  
45 276 6. Paulozzi LJ, Budnitz DS, Xi Y. Increasing deaths from opioid analgesics in the United States.  
46  
47 277 *Pharmacoepidemiol Drug Saf*. 2006;15(9):618-27.  
48  
49  
50 278 7. Fischer B, Jones W, Murphy Y, Ialomiteanu A, Rehm J. Recent developments in prescription  
51  
52 279 opioid-related dispensing and harm indicators in Ontario, Canada. *Pain Physician*.  
53  
54 280 2015;18(4):e659-e662.  
55  
56  
57  
58  
59  
60

- 1  
2  
3 281 8. Fischer B, Argento E. Prescription opioid related misuse, harms, diversion and interventions  
4  
5 282 in Canada: a review. *Pain Physician*. 2012;15(3 Suppl):es191-203.  
6  
7  
8 283 9. Rudd RA, Aleshire N, Zibbell JE, Matthew Gladden R. Increases in drug and opioid overdose  
9  
10 284 deaths—United States, 2000–2014. *Am J Transplant*. 2016;16(4):1323-7.  
11  
12  
13 285 10. Denton JS, Donoghue ER, McReynolds J, Kalelkar MB. An epidemic of illicit fentanyl deaths  
14  
15 286 in Cook County, Illinois: September 2005 through April 2007. *J Forensic Sci*. 2008;53(2):452-  
16  
17 287 4.  
18  
19  
20 288 11. Gomes T, Juurlink DN, Dhalla IA, Mailis-Gagnon A, Paterson JM, Mamdani MM. Trends in  
21  
22 289 opioid use and dosing among socio-economically disadvantaged patients. *Open Med*.  
23  
24 290 2011;5(1):e13-e22.  
25  
26  
27 291 12. Fischer B, Cruz MF, Rehm J. Illicit opioid use and its key characteristics: a select overview  
28  
29 292 and evidence from a Canadian multisite cohort of illicit opioid users (OPICAN). *Can J*  
30  
31 293 *Psychiatry*. 2006;51(10):624-34.  
32  
33  
34 294 13. Spiller H, Lorenz DJ, Bailey EJ, Dart RC. Epidemiological trends in abuse and misuse of  
35  
36 295 prescription opioids. *J Addict Dis*. 2009;28(2):130-36.  
37  
38  
39 296 14. Fischer B, Rehm J, Brissette S, Brochu S, Bruneau J, El-Guebaly N, et al. Illicit opioid use in  
40  
41 297 Canada: comparing social, health, and drug use characteristics of untreated users in five  
42  
43 298 cities (OPICAN study). *J Urban Health*. 2005;82(2):250-66.  
44  
45  
46 299 15. Oviedo-Joekes E, Nosyk B, Brissette S, Chettiar J, Schneeberger P, Marsh DC, et al. The North  
47  
48 300 American opiate medication initiative (NAOMI): profile of participants in North America's  
49  
50 301 first trial of heroin-assisted treatment. *J Urban Health*. 2008;85(6):812-25.  
51  
52  
53  
54  
55  
56  
57  
58  
59  
60

- 1  
2  
3 302 16. Fischer B, Rehm J. Deaths related to the use of prescription opioids. *CMAJ*.  
4  
5 303 2009;181(12):881-2.  
6  
7  
8 304 17. Gomes T, Pasricha S, Martins D, Greaves S, Tadrus M, Bandola D. Behind the prescriptions:  
9  
10 305 a snapshot of opioid use across all Ontarians. Toronto, ON: Ontario Drug Policy Research  
11  
12 306 Network; 2017. Available: [http://odprn.ca/research/publications/opioid-prescribing-in-](http://odprn.ca/research/publications/opioid-prescribing-in-ontario-august-2017/)  
13  
14 307 [ontario-august-2017/](http://odprn.ca/research/publications/opioid-prescribing-in-ontario-august-2017/) (accessed 2017 August 31).  
15  
16  
17  
18 308 18. Canadian Institute for Health Information, Canadian Centre on Substance Abuse.  
19  
20 309 Hospitalizations and emergency department visits due to opioid poisoning in Canada.  
21  
22 310 Ottawa, ON: CIHI; 2016. Available: [https://www.cihi.ca/en/13-canadians-hospitalized-each-](https://www.cihi.ca/en/13-canadians-hospitalized-each-day-for-opioid-poisoning)  
23  
24 311 [day-for-opioid-poisoning](https://www.cihi.ca/en/13-canadians-hospitalized-each-day-for-opioid-poisoning) (accessed 2017 Aug 8).  
25  
26  
27  
28 312 19. Levinson-Castiel R, Merlob P, Linder N, Sirota L, Klinger G. Neonatal abstinence syndrome  
29  
30 313 after in utero exposure to selective serotonin reuptake inhibitors in term infants. *Arch*  
31  
32 314 *Pediatr Adolesc Med*. 2006;160(2):173-6.  
33  
34  
35 315 20. Pierog S, Chandavas O, Wexler I. Withdrawal symptoms in infants with the fetal alcohol  
36  
37 316 syndrome. *J Pediatr*. 1977;90(4):630-3.  
38  
39  
40 317 21. Bauer CR, Langer JC, Shankaran S, Bada HS, Lester B, Wright LL, et al. Acute neonatal effects  
41  
42 318 of cocaine exposure during pregnancy. *Arch Pediatr Adolesc Med*. 2005;159(9):824-34.  
43  
44  
45 319 22. Rementería JL, Bhatt K. Withdrawal symptoms in neonates from intrauterine exposure to  
46  
47 320 diazepam. *J Pediatr*. 1977;90(1):123-6.  
48  
49  
50 321 23. Doberczak TM, Kandal SR, Wilets I. Neonatal opiate abstinence syndrome in term and  
51  
52 322 preterm infants. *J Pediatr*. 1991;118(6):933-7.  
53  
54  
55  
56  
57  
58  
59  
60

- 1  
2  
3 323 24. Statistics Canada. Table 111-0015. Ottawa, ON: Government of Canada; 2017. Available:  
4  
5  
6 324 <http://www5.statcan.gc.ca/cansim/a47> (accessed 2017 Aug 8).  
7  
8 325 25. Statistics Canada. Postal code conversion file (PCCF), reference guide. Ottawa, ON:  
9  
10 326 Government of Canada; 2015. Available: [http://www.statcan.gc.ca/pub/92-154-g/92-154-](http://www.statcan.gc.ca/pub/92-154-g/92-154-g2015001-eng.htm)  
11  
12 327 [g2015001-eng.htm](http://www.statcan.gc.ca/pub/92-154-g/92-154-g2015001-eng.htm) (accessed 2017 Aug 8).  
13  
14  
15 328 26. Ontario. Ministry of Health and Long-Term Care, IntelliHealth Ontario. *Population estimates,*  
16  
17 329 *2003-2015*. Toronto, ON: Queen's Printer for Ontario; 2017.  
18  
19  
20 330 27. Ontario. Ministry of Health and Long-Term Care, IntelliHealth Ontario. *Population*  
21  
22 331 *projections, 2016-2017*. Toronto, ON: Queen's Printer for Ontario; 2017.  
23  
24  
25 332 28. Choi BC, de Guia NA, Walsh P. Look before you leap: stratify before you standardize. *Am J*  
26  
27 333 *Epidemiol.* 1999;149(12):1087-96.  
28  
29  
30 334 29. Curtin LR, Klein RJ. *Direct standardization (age-adjusted death rates)*. US Department of  
31  
32 335 Health and Human Services, Public Health Service, Centers for Disease Control and  
33  
34 336 Prevention, National Center for Health Statistics; 1995.  
35  
36  
37 337 30. Ontario Agency for Health Protection and Promotion (Public Health Ontario). Summary  
38  
39 338 measures of socioeconomic inequalities in health. Toronto, ON: Queen's Printer for Ontario;  
40  
41 339 2013. Available:  
42  
43 340 [http://www.publichealthontario.ca/en/eRepository/Summary\\_Measures\\_Socioeconomic\\_I](http://www.publichealthontario.ca/en/eRepository/Summary_Measures_Socioeconomic_I)  
44  
45 341 [nequalities\\_Health\\_2013.pdf](http://www.publichealthontario.ca/en/eRepository/Summary_Measures_Socioeconomic_I) (accessed 2017 Aug 8).  
46  
47  
48  
49 342 31. Tolia VN, Patrick SW, Bennett MM, Murthy K, Sousa J, Smith PB, et al. Increasing incidence  
50  
51 343 of the neonatal abstinence syndrome in U.S. neonatal ICUs. *N Engl J Med.*  
52  
53 344 2015;372(22):2118-26.  
54  
55  
56  
57  
58  
59  
60

- 1  
2  
3 345 32. Brogly SB, Turner S, Lajkosz K, Davies G, Newman A, Johnson A, et al. Infants born to opioid-  
4  
5 346 dependent women in Ontario, 2002–2014. *J Obstet Gynaecol Can.* 2017;39(3):157-65.  
6  
7  
8 347 33. Davies H, Gilbert R, Johnson K, Petersen I, Nazareth I, O'Donnell M, et al. Neonatal drug  
9  
10 348 withdrawal syndrome: cross-country comparison using hospital administrative data in  
11  
12 349 England, the USA, Western Australia and Ontario, Canada. *Arch Dis Child Fetal Neonatal Ed.*  
13  
14 350 2016;101(1):F26-30.  
15  
16  
17 351 34. Patrick SW, Schumacher RE, Benneyworth BD, Krans EE, McAllister JM, Davis MM. Neonatal  
18  
19 352 abstinence syndrome and associated health care expenditures: United States, 2000–2009.  
20  
21 353 *JAMA.* 2012;307(18):1934-40.  
22  
23  
24 354 35. Epstein RA, Bobo WV, Martin PR, Morrow JA, Wang W, Chandrasekhar R, et al. Increasing  
25  
26 355 pregnancy-related use of prescribed opioid analgesics. *Ann Epidemiol.* 2013;23(8):498-503.  
27  
28  
29 356 36. Furlan AD, Reardon R, Weppler C. Opioids for chronic noncancer pain: a new Canadian  
30  
31 357 practice guideline. *CMAJ.* 2010;182(9):923-30.  
32  
33  
34 358 37. Fischer B, Kurdyak P, Goldner E, Tyndall M, Rehm J. Treatment of prescription opioid  
35  
36 359 disorders in Canada: looking at the 'other epidemic'? *Subst Abuse Treat Prev Policy.*  
37  
38 360 2016;11(1):12.  
39  
40  
41 361 38. Paulozzi LJ. Prescription drug overdoses: a review. *J Safety Res.* 2012;43(4):283-9.  
42  
43  
44 362 39. Centers for Disease Control and Prevention. Overdose deaths involving prescription opioids  
45  
46 363 among Medicaid enrollees - Washington, 2004–2007. *MMWR Morb Mortal Wkly Rep.*  
47  
48 364 2009;58(42):1171-5.  
49  
50  
51 365 40. Rintoul AC, Dobbin MD, Drummer OH, Ozanne-Smith J. Increasing deaths involving  
52  
53 366 oxycodone, Victoria, Australia, 2000–09. *Inj Prev.* 2011;17:254-59.  
54  
55  
56  
57  
58  
59  
60

1  
2  
3  
4  
5  
6  
7  
8  
9  
10  
11  
12  
13  
14  
15  
16  
17  
18  
19  
20  
21  
22  
23  
24  
25  
26  
27  
28  
29  
30  
31  
32  
33  
34  
35  
36  
37  
38  
39  
40  
41  
42  
43  
44  
45  
46  
47  
48  
49  
50  
51  
52  
53  
54  
55  
56  
57  
58  
59  
60

367 41. Xiang Y, Zhao W, Xiang H, Smith GA. ED visits for drug-related poisoning in the United  
368 States, 2007. *Am J Emerg Med.* 2012;30(2):293-301.

Confidential

1  
2  
3 369 **APPENDIX 1**

4  
5 370 **Inclusion and exclusion criteria**

6  
7  
8 371 Unique cases of NAS were identified by ICD-10-CA code P96.1 (neonatal withdrawal symptoms  
9  
10 372 from maternal use of drugs of addiction). Cases of NAS were excluded if they had a query or  
11  
12 373 suspected diagnosis, or if they were beyond the neonatal age range of 0 to 28 days. One case  
13  
14 374 was counted per infant regardless of how many times they were hospitalized in those 28 days.  
15  
16 375 Cases of NAS were identified using the Discharge Abstract Database (DAD). DAD is housed at  
17  
18 376 the Canadian Institute for Health Information (CIHI) and captures administrative, clinical, and  
19  
20 377 demographic information on all Canadian hospital discharges.  
21  
22  
23

24  
25 378 Unique cases of opioid poisoning resulting in unscheduled ED visits and hospitalizations  
26  
27 379 were identified by ICD-10-CA codes T40.0 (poisoning by opium), T40.1 (poisoning by heroin),  
28  
29 380 T40.2 (poisoning for other opioids), T40.3 (poisoning by methadone), T40.4 (poisoning by other  
30  
31 381 synthetic narcotics), and T40.6 (poisoning by other and unspecified narcotics). Cases were  
32  
33 382 excluded if they had a query or suspected diagnosis. Opioid poisonings were identified from the  
34  
35 383 National Ambulatory Care Reporting System (NACRS), DAD, and the Ontario Opioid-Related  
36  
37 384 Death Database (OORDD). NACRS is housed at CIHI and contains data on all hospital and  
38  
39 385 community based ambulatory care, including emergency department utilization, day surgery,  
40  
41 386 and outpatient/community-based clinics in Canada. The OORDD was created by the Ontario  
42  
43 387 Drug Policy Research Network and contains record of all deaths in Ontario where opioids are  
44  
45 388 considered as contributing to the cause of death by the Office of the Chief Coroner for Ontario.  
46  
47  
48  
49  
50

51  
52 389 Unique cases of non-poisoning opioid-related events resulting in ED visits or  
53  
54 390 hospitalization were identified by ICD-10-CA codes for mental and behavioural disorders due to  
55  
56  
57  
58  
59  
60

1  
2  
3 391 use of opioids: F11.0 (acute intoxication), F11.1 (harmful use), F11.2 (dependence syndrome),  
4  
5 392 F11.3 (withdrawal state), F11.4 (withdrawal state with delirium), F11.5 (psychotic disorder),  
6  
7  
8 393 F11.6 (amnesic syndrome), F11.7 (residual and late-onset psychotic disorder), F11.8 (other  
9  
10 394 mental and behavioural disorders), and F11.9 (unspecified mental and behavioural disorder).

11  
12  
13 395 Cases were excluded if they had a query or suspected diagnosis. Non-poisoning opioid-related  
14  
15 396 cases admitted to a mental health hospital were identified by DSM-IV-TR codes 305.50 (opioid  
16  
17 397 abuse) and 304.00 (opioid dependence), and DSM-5 codes 305.50 (opioid use disorder, mild)  
18  
19 398 and 304.00 (opioid use disorder, moderate to severe). Non-poisoning ED visits were identified  
20  
21 399 from NACRS. Non-poisoning hospitalizations were identified from DAD and the Ontario Mental  
22  
23 400 Health Reporting System (OMHRS). OMHRS is housed at CIHI and contains administrative and  
24  
25 401 clinical data on usage of adult acute care mental health beds in Ontario. Validation studies?  
26  
27  
28  
29

30 402

### 31 32 403 **Data Quality and Access**

33  
34  
35 404 There have been no validation studies for ICD-10 codes used to capture cases of NAS, opioid  
36  
37 405 poisonings, and non-poisoning opioid-related events; however, these codes have been  
38  
39 406 consistently used in similar studies of opioid-related harms using administrative databases.<sup>2,18,33</sup>  
40  
41 407 For additional information on study protocol, algorithms used, or programming code, the  
42  
43 408 corresponding author can be contacted.  
44  
45  
46  
47  
48  
49  
50  
51  
52  
53  
54  
55  
56  
57  
58  
59  
60



**APPENDIX 2****Table 1.** Descriptive characteristics of income quintiles.

| Quintile | Mean after-tax<br>incomes*, \$CDN<br>(sd) | Range of after-tax<br>incomes*, \$CDN | Proportion of low<br>income residents (%) | Mean age*, yr<br>(sd) | Mean percent<br>receiving EI (%) | Dissemination<br>areas, n (%) | Proportion of<br>population (%) |
|----------|-------------------------------------------|---------------------------------------|-------------------------------------------|-----------------------|----------------------------------|-------------------------------|---------------------------------|
| Q1       | 77,379.16<br>(23,207.76)                  | 27,550.00 -<br>279,470.00             | 0 – 6.7                                   | 40.5 (5.9)            | 8.0 (4.6)                        | 3321 (19.7)                   | 18.0                            |
| Q2       | 62,659.18<br>(16,318.30)                  | 24,200.00 -<br>223,210.00             | 6.8 – 10.0                                | 40.3 (5.2)            | 9.9 (4.6)                        | 3494 (20.7)                   | 22.0                            |
| Q3       | 53,330.04<br>(13,208.75)                  | 21,570.00 -<br>147,200.00             | 10.1 - 14.5                               | 39.7 (5.2)            | 10.9 (4.8)                       | 3321 (19.7)                   | 20.3                            |
| Q4       | 43,500.37<br>(9,030.02)                   | 17,510.00 -<br>132,180.00             | 14.6 - 21.6                               | 38.8 (4.9)            | 11.9 (4.9)                       | 3371 (20.0)                   | 19.2                            |
| Q5       | 31,616.71<br>(7,415.12)                   | 5,840.00 -<br>73,490.00               | 21.7 - 86.0                               | 36.7 (5.2)            | 13.0 (5.4)                       | 3380 (20.0)                   | 20.4                            |

\* Calculated using the median after-tax income and average age for each dissemination area in a given quintile, as provided by Statistics Canada T1FF data.

1  
2  
3  
4  
5  
6  
7  
8  
9  
10  
11  
12  
13  
14  
15  
16  
17  
18  
19  
20  
21  
22  
23  
24  
25  
26  
27  
28  
29  
30  
31  
32  
33  
34  
35  
36  
37  
38  
39  
40  
41  
42  
43  
44  
45  
46  
47

**Table 2.** Rates and 95% CIs of NAS per 1,000 live births, opioid poisonings per 100,000, and non-overdose events per 100,000.

| Year | <u>NAS</u>                          |                                               | <u>Opioid Poisonings</u>                  |                                            | <u>Non-poisoning visits</u>                   |                                           |
|------|-------------------------------------|-----------------------------------------------|-------------------------------------------|--------------------------------------------|-----------------------------------------------|-------------------------------------------|
|      | Rate per 1,000 live births (95% CI) | <u>ED Visits</u><br>Rate per 100,000 (95% CI) | <u>Hosp.</u><br>Rate per 100,000 (95% CI) | <u>Deaths</u><br>Rate per 100,000 (95% CI) | <u>ED Visits</u><br>Rate per 100,000 (95% CI) | <u>Hosp.</u><br>Rate per 100,000 (95% CI) |
| 2003 | 1.08 (0.905-1.26)                   | 15.18 (14.49-15.87)                           | 9.70 (9.15-10.25)                         | 2.99 (2.68-3.30)                           | 14.06 (13.39-14.72)                           | 12.89 (12.25-13.52)                       |
| 2004 | 1.44 (1.42-1.64)                    | 16.49 (15.77-17.20)                           | 10.29 (9.73-10.86)                        | 2.74 (2.45-3.04)                           | 19.09 (18.32-19.86)                           | 15.54 (14.85-16.24)                       |
| 2005 | 1.57 (1.36-1.78)                    | 16.65 (15.94-17.37)                           | 10.56 (9.99-11.13)                        | 3.54 (3.21-3.87)                           | 22.67 (21.84-23.50)                           | 16.84 (16.12-17.56)                       |
| 2006 | 1.80 (1.58-2.02)                    | 16.98 (16.26-17.70)                           | 9.73 (9.19-10.27)                         | 3.44 (3.12-3.77)                           | 27.00 (26.09-27.90)                           | 14.33 (13.68-14.99)                       |
| 2007 | 2.25 (2.00-2.49)                    | 17.47 (16.75-18.20)                           | 9.71 (9.17-10.25)                         | 3.67 (3.33-4.00)                           | 29.62 (28.68-30.57)                           | 15.00 (14.32-15.67)                       |
| 2008 | 2.52 (2.26-2.78)                    | 18.72 (17.97-19.46)                           | 10.22 (9.66-10.77)                        | 3.81 (3.47-4.15)                           | 37.27 (36.21-38.32)                           | 16.60 (15.90-17.31)                       |
| 2009 | 3.19 (2.90-3.49)                    | 22.20 (21.39-23.01)                           | 11.16 (10.58-11.73)                       | 4.07 (3.72-4.42)                           | 46.72 (45.55-47.90)                           | 18.39 (17.65-19.13)                       |
| 2010 | 4.16 (3.82-4.50)                    | 21.63 (20.83-22.42)                           | 10.92 (10.36-11.49)                       | 4.35 (3.99-4.70)                           | 51.95 (50.72-53.19)                           | 19.79 (19.03-20.55)                       |
| 2011 | 5.31 (4.92-5.69)                    | 22.12 (21.32-22.92)                           | 12.10 (11.51-12.69)                       | 4.19 (3.84-4.54)                           | 53.12 (51.88-54.36)                           | 20.92 (20.14-21.70)                       |
| 2012 | 5.14 (4.76-5.52)                    | 23.52 (22.70-24.34)                           | 13.24 (12.62-13.85)                       | 4.36 (4.01-4.72)                           | 49.26 (48.07-50.44)                           | 23.37 (22.55-24.19)                       |
| 2013 | 5.86 (5.45-6.26)                    | 22.51 (17.72-23.31)                           | 12.33 (11.74-12.92)                       | 4.72 (4.35-5.08)                           | 43.44 (42.33-44.55)                           | 24.54 (23.71-25.38)                       |
| 2014 | 6.54 (6.12-6.97)                    | 24.47 (23.64-25.30)                           | 12.47 (11.88-13.06)                       | 4.94 (4.57-5.31)                           | 41.37 (40.30-42.45)                           | 24.28 (23.45-25.11)                       |
| 2015 | 6.37 (5.94-6.79)                    | 26.31 (25.45-27.16)                           | 12.65 (12.06-13.25)                       | 5.29 (4.91-5.68)                           | 46.61 (45.47-47.75)                           | 25.86 (25.01-26.70)                       |
| 2016 | 6.49 (6.06-6.92)                    | 31.66 (30.73-32.60)                           | 13.56 (12.95-14.17)                       | N/A                                        | 54.26 (53.04-55.48)                           | 27.84 (26.96-28.71)                       |

**The RECORD statement – checklist of items, extended from the STROBE statement, that should be reported in observational studies using routinely collected health data.**

|                           | Item No. | STROBE items                                                                                                                                                                               | Location in manuscript where items are reported | RECORD items                                                                                                                                                                                                                                                                                                                                                                                                                                | Location in manuscript where items are reported                                 |
|---------------------------|----------|--------------------------------------------------------------------------------------------------------------------------------------------------------------------------------------------|-------------------------------------------------|---------------------------------------------------------------------------------------------------------------------------------------------------------------------------------------------------------------------------------------------------------------------------------------------------------------------------------------------------------------------------------------------------------------------------------------------|---------------------------------------------------------------------------------|
| <b>Title and abstract</b> |          |                                                                                                                                                                                            |                                                 |                                                                                                                                                                                                                                                                                                                                                                                                                                             |                                                                                 |
|                           | 1        | (a) Indicate the study's design with a commonly used term in the title or the abstract (b) Provide in the abstract an informative and balanced summary of what was done and what was found | a) Page 1<br>b) Page 2                          | RECORD 1.1: The type of data used should be specified in the title or abstract. When possible, the name of the databases used should be included.<br><br>RECORD 1.2: If applicable, the geographic region and timeframe within which the study took place should be reported in the title or abstract.<br><br>RECORD 1.3: If linkage between databases was conducted for the study, this should be clearly stated in the title or abstract. | 1.1: Page 2<br><br>1.2: Page 2<br><br>1.3: Not applicable, no linkage conducted |
| <b>Introduction</b>       |          |                                                                                                                                                                                            |                                                 |                                                                                                                                                                                                                                                                                                                                                                                                                                             |                                                                                 |
| Background rationale      | 2        | Explain the scientific background and rationale for the investigation being reported                                                                                                       | Page 3                                          |                                                                                                                                                                                                                                                                                                                                                                                                                                             |                                                                                 |
| Objectives                | 3        | State specific objectives, including any prespecified hypotheses                                                                                                                           | Pages 3-4                                       |                                                                                                                                                                                                                                                                                                                                                                                                                                             |                                                                                 |
| <b>Methods</b>            |          |                                                                                                                                                                                            |                                                 |                                                                                                                                                                                                                                                                                                                                                                                                                                             |                                                                                 |
| Study Design              | 4        | Present key elements of study design early in the paper                                                                                                                                    | Page 4                                          |                                                                                                                                                                                                                                                                                                                                                                                                                                             |                                                                                 |
| Setting                   | 5        | Describe the setting, locations, and relevant dates, including periods of recruitment, exposure, follow-up, and data collection                                                            | Page 4                                          |                                                                                                                                                                                                                                                                                                                                                                                                                                             |                                                                                 |
| Participants              | 6        | (a) <i>Cohort study</i> - Give the                                                                                                                                                         |                                                 | RECORD 6.1: The methods of study                                                                                                                                                                                                                                                                                                                                                                                                            |                                                                                 |

|                              |   |                                                                                                                                                                                                                                                                                                                                                                                                                                                                                                                                                                                                                                                                                           |                                                                           |                                                                                                                                                                                                                                                                                                                                                                                                                                                                                                                                                                                                                                                                     |                                                                                              |
|------------------------------|---|-------------------------------------------------------------------------------------------------------------------------------------------------------------------------------------------------------------------------------------------------------------------------------------------------------------------------------------------------------------------------------------------------------------------------------------------------------------------------------------------------------------------------------------------------------------------------------------------------------------------------------------------------------------------------------------------|---------------------------------------------------------------------------|---------------------------------------------------------------------------------------------------------------------------------------------------------------------------------------------------------------------------------------------------------------------------------------------------------------------------------------------------------------------------------------------------------------------------------------------------------------------------------------------------------------------------------------------------------------------------------------------------------------------------------------------------------------------|----------------------------------------------------------------------------------------------|
|                              |   | <p>eligibility criteria, and the sources and methods of selection of participants. Describe methods of follow-up</p> <p><i>Case-control study</i> - Give the eligibility criteria, and the sources and methods of case ascertainment and control selection. Give the rationale for the choice of cases and controls</p> <p><i>Cross-sectional study</i> - Give the eligibility criteria, and the sources and methods of selection of participants</p> <p><i>(b) Cohort study</i> - For matched studies, give matching criteria and number of exposed and unexposed</p> <p><i>Case-control study</i> - For matched studies, give matching criteria and the number of controls per case</p> | <p>a) Pages 4-5, 23-24</p> <p>b) Not applicable, no matching was used</p> | <p>population selection (such as codes or algorithms used to identify subjects) should be listed in detail. If this is not possible, an explanation should be provided.</p> <p>RECORD 6.2: Any validation studies of the codes or algorithms used to select the population should be referenced. If validation was conducted for this study and not published elsewhere, detailed methods and results should be provided.</p> <p>RECORD 6.3: If the study involved linkage of databases, consider use of a flow diagram or other graphical display to demonstrate the data linkage process, including the number of individuals with linked data at each stage.</p> | <p>6.1: Pages 23-24</p> <p>6.2: Page 24</p> <p>6.3: Not applicable, no linkage conducted</p> |
| Variables                    | 7 | Clearly define all outcomes, exposures, predictors, potential confounders, and effect modifiers. Give diagnostic criteria, if applicable.                                                                                                                                                                                                                                                                                                                                                                                                                                                                                                                                                 | Not applicable for a population health assessment                         | RECORD 7.1: A complete list of codes and algorithms used to classify exposures, outcomes, confounders, and effect modifiers should be provided. If these cannot be reported, an explanation should be provided.                                                                                                                                                                                                                                                                                                                                                                                                                                                     | 7.1: Pages 23-24                                                                             |
| Data sources/<br>measurement | 8 | For each variable of interest, give sources of data and details of methods of assessment (measurement). Describe comparability of assessment methods if there is more than one group                                                                                                                                                                                                                                                                                                                                                                                                                                                                                                      | Pages 4-6, 23-24                                                          |                                                                                                                                                                                                                                                                                                                                                                                                                                                                                                                                                                                                                                                                     |                                                                                              |
| Bias                         | 9 | Describe any efforts to address potential sources of bias                                                                                                                                                                                                                                                                                                                                                                                                                                                                                                                                                                                                                                 | Page 7                                                                    |                                                                                                                                                                                                                                                                                                                                                                                                                                                                                                                                                                                                                                                                     |                                                                                              |

|                                                                                                                                                  |                                  |    |                                                                                                                                                                                                                                                                                                                                                                                                                                                                                                                                                                      |                                                                                                          |                                                                                                                                                                                                                                                              |
|--------------------------------------------------------------------------------------------------------------------------------------------------|----------------------------------|----|----------------------------------------------------------------------------------------------------------------------------------------------------------------------------------------------------------------------------------------------------------------------------------------------------------------------------------------------------------------------------------------------------------------------------------------------------------------------------------------------------------------------------------------------------------------------|----------------------------------------------------------------------------------------------------------|--------------------------------------------------------------------------------------------------------------------------------------------------------------------------------------------------------------------------------------------------------------|
| 1<br>2<br>3<br>4<br>5<br>6<br>7                                                                                                                  | Study size                       | 10 | Explain how the study size was arrived at                                                                                                                                                                                                                                                                                                                                                                                                                                                                                                                            | Page 4                                                                                                   |                                                                                                                                                                                                                                                              |
| 8<br>9<br>10<br>11<br>12<br>13<br>14<br>15<br>16<br>17<br>18<br>19<br>20<br>21<br>22<br>23<br>24<br>25<br>26<br>27<br>28<br>29<br>30<br>31<br>32 | Quantitative variables           | 11 | Explain how quantitative variables were handled in the analyses. If applicable, describe which groupings were chosen, and why                                                                                                                                                                                                                                                                                                                                                                                                                                        | Pages 5-6                                                                                                |                                                                                                                                                                                                                                                              |
| 33<br>34<br>35<br>36<br>37<br>38<br>39<br>40<br>41<br>42                                                                                         | Statistical methods              | 12 | (a) Describe all statistical methods, including those used to control for confounding<br>(b) Describe any methods used to examine subgroups and interactions<br>(c) Explain how missing data were addressed<br>(d) <i>Cohort study</i> - If applicable, explain how loss to follow-up was addressed<br><i>Case-control study</i> - If applicable, explain how matching of cases and controls was addressed<br><i>Cross-sectional study</i> - If applicable, describe analytical methods taking account of sampling strategy<br>(e) Describe any sensitivity analyses | a) Pages 7-8<br><br>b) Not applicable<br><br>c) Page 6<br><br>d) Not applicable<br><br>e) Not applicable |                                                                                                                                                                                                                                                              |
| 43<br>44<br>45<br>46<br>47                                                                                                                       | Data access and cleaning methods |    | ..                                                                                                                                                                                                                                                                                                                                                                                                                                                                                                                                                                   |                                                                                                          | RECORD 12.1: Authors should describe the extent to which the investigators had access to the database population used to create the study population.<br><br>RECORD 12.2: Authors should provide information on the data cleaning methods used in the study. |
|                                                                                                                                                  | Linkage                          |    | ..                                                                                                                                                                                                                                                                                                                                                                                                                                                                                                                                                                   |                                                                                                          | RECORD 12.3: State whether the                                                                                                                                                                                                                               |

|                  |    |                                                                                                                                                                                                                                                                                                                               |                                      |                                                                                                                                                                                                                                                                                                           |                         |
|------------------|----|-------------------------------------------------------------------------------------------------------------------------------------------------------------------------------------------------------------------------------------------------------------------------------------------------------------------------------|--------------------------------------|-----------------------------------------------------------------------------------------------------------------------------------------------------------------------------------------------------------------------------------------------------------------------------------------------------------|-------------------------|
|                  |    |                                                                                                                                                                                                                                                                                                                               |                                      | study included person-level, institutional-level, or other data linkage across two or more databases. The methods of linkage and methods of linkage quality evaluation should be provided.                                                                                                                | applicable, no linkage. |
| <b>Results</b>   |    |                                                                                                                                                                                                                                                                                                                               |                                      |                                                                                                                                                                                                                                                                                                           |                         |
| Participants     | 13 | (a) Report the numbers of individuals at each stage of the study (e.g., numbers potentially eligible, examined for eligibility, confirmed eligible, included in the study, completing follow-up, and analysed)<br>(b) Give reasons for non-participation at each stage.<br>(c) Consider use of a flow diagram                 | a) Page 8-9<br><br>b) Not applicable | RECORD 13.1: Describe in detail the selection of the persons included in the study (i.e., study population selection) including filtering based on data quality, data availability and linkage. The selection of included persons can be described in the text and/or by means of the study flow diagram. | a) Pages 4-5            |
| Descriptive data | 14 | (a) Give characteristics of study participants (e.g., demographic, clinical, social) and information on exposures and potential confounders<br>(b) Indicate the number of participants with missing data for each variable of interest<br>(c) <i>Cohort study</i> - summarise follow-up time (e.g., average and total amount) | a) Pages 8-9<br><br>b) Pages 8-9     |                                                                                                                                                                                                                                                                                                           |                         |
| Outcome data     | 15 | <i>Cohort study</i> - Report numbers of outcome events or summary measures over time<br><i>Case-control study</i> - Report numbers in each exposure category, or summary measures of exposure<br><i>Cross-sectional study</i> - Report numbers of outcome events or                                                           | Pages 10-11                          |                                                                                                                                                                                                                                                                                                           |                         |

|                                                                                           |                   |                  |                                                                                                                                                                                                                                                                                                                                                                                                                 |                                                                                                 |                                                                                                                                                                                                                                                                                                          |         |
|-------------------------------------------------------------------------------------------|-------------------|------------------|-----------------------------------------------------------------------------------------------------------------------------------------------------------------------------------------------------------------------------------------------------------------------------------------------------------------------------------------------------------------------------------------------------------------|-------------------------------------------------------------------------------------------------|----------------------------------------------------------------------------------------------------------------------------------------------------------------------------------------------------------------------------------------------------------------------------------------------------------|---------|
|                                                                                           |                   | summary measures |                                                                                                                                                                                                                                                                                                                                                                                                                 |                                                                                                 |                                                                                                                                                                                                                                                                                                          |         |
| 1<br>2<br>3<br>4<br>5<br>6<br>7<br>8<br>9<br>10<br>11<br>12<br>13<br>14<br>15<br>16<br>17 | Main results      | 16               | (a) Give unadjusted estimates and, if applicable, confounder-adjusted estimates and their precision (e.g., 95% confidence interval). Make clear which confounders were adjusted for and why they were included<br>(b) Report category boundaries when continuous variables were categorized<br>(c) If relevant, consider translating estimates of relative risk into absolute risk for a meaningful time period | a) Not applicable – population health assessment<br><br>b) Not applicable<br><br>c) Pages 13-14 |                                                                                                                                                                                                                                                                                                          |         |
| 18<br>19<br>20<br>21                                                                      | Other analyses    | 17               | Report other analyses done—e.g., analyses of subgroups and interactions, and sensitivity analyses                                                                                                                                                                                                                                                                                                               | Not applicable                                                                                  |                                                                                                                                                                                                                                                                                                          |         |
| 22                                                                                        | <b>Discussion</b> |                  |                                                                                                                                                                                                                                                                                                                                                                                                                 |                                                                                                 |                                                                                                                                                                                                                                                                                                          |         |
| 23<br>24<br>25                                                                            | Key results       | 18               | Summarise key results with reference to study objectives                                                                                                                                                                                                                                                                                                                                                        | Pages 14-15                                                                                     |                                                                                                                                                                                                                                                                                                          |         |
| 26<br>27<br>28<br>29<br>30<br>31<br>32<br>33<br>34<br>35                                  | Limitations       | 19               | Discuss limitations of the study, taking into account sources of potential bias or imprecision. Discuss both direction and magnitude of any potential bias                                                                                                                                                                                                                                                      | Page 15-16                                                                                      | RECORD 19.1: Discuss the implications of using data that were not created or collected to answer the specific research question(s). Include discussion of misclassification bias, unmeasured confounding, missing data, and changing eligibility over time, as they pertain to the study being reported. | Page 16 |
| 36<br>37<br>38<br>39<br>40<br>41<br>42<br>43<br>44                                        | Interpretation    | 20               | Give a cautious overall interpretation of results considering objectives, limitations, multiplicity of analyses, results from similar studies, and other relevant evidence                                                                                                                                                                                                                                      | Pages 15-16                                                                                     |                                                                                                                                                                                                                                                                                                          |         |

1  
2  
3  
4  
5  
6  
7  
8  
9  
10  
11  
12  
13  
14  
15  
16  
17  
18  
19  
20  
21  
22  
23  
24  
25  
26  
27  
28  
29  
30  
31  
32  
33  
34  
35  
36  
37  
38  
39  
40  
41  
42  
43  
44  
45  
46  
47

|                                                           |    |                                                                                                                                                               |             |                                                                                                                                                          |         |
|-----------------------------------------------------------|----|---------------------------------------------------------------------------------------------------------------------------------------------------------------|-------------|----------------------------------------------------------------------------------------------------------------------------------------------------------|---------|
| Generalisability                                          | 21 | Discuss the generalisability (external validity) of the study results                                                                                         | Pages 15-16 |                                                                                                                                                          |         |
| <b>Other Information</b>                                  |    |                                                                                                                                                               |             |                                                                                                                                                          |         |
| Funding                                                   | 22 | Give the source of funding and the role of the funders for the present study and, if applicable, for the original study on which the present article is based | Page 1      |                                                                                                                                                          |         |
| Accessibility of protocol, raw data, and programming code |    | ..                                                                                                                                                            |             | RECORD 22.1: Authors should provide information on how to access any supplemental information such as the study protocol, raw data, or programming code. | Page 24 |

\*Reference: Benchimol EI, Smeeth L, Guttman A, Harron K, Moher D, Petersen I, Sørensen HT, von Elm E, Langan SM, the RECORD Working Committee. The REporting of studies Conducted using Observational Routinely-collected health Data (RECORD) Statement. *PLoS Medicine* 2015; in press.

\*Checklist is protected under Creative Commons Attribution ([CC BY](#)) license.
